# Supplementary material
Source: PubMed Central journal article supplement (PMC4724552)
Supplement: NIHMS740399-supplement-1.pdf [file NIHMS740399-supplement-1.pdf]

# Supplemental Figure 1 :

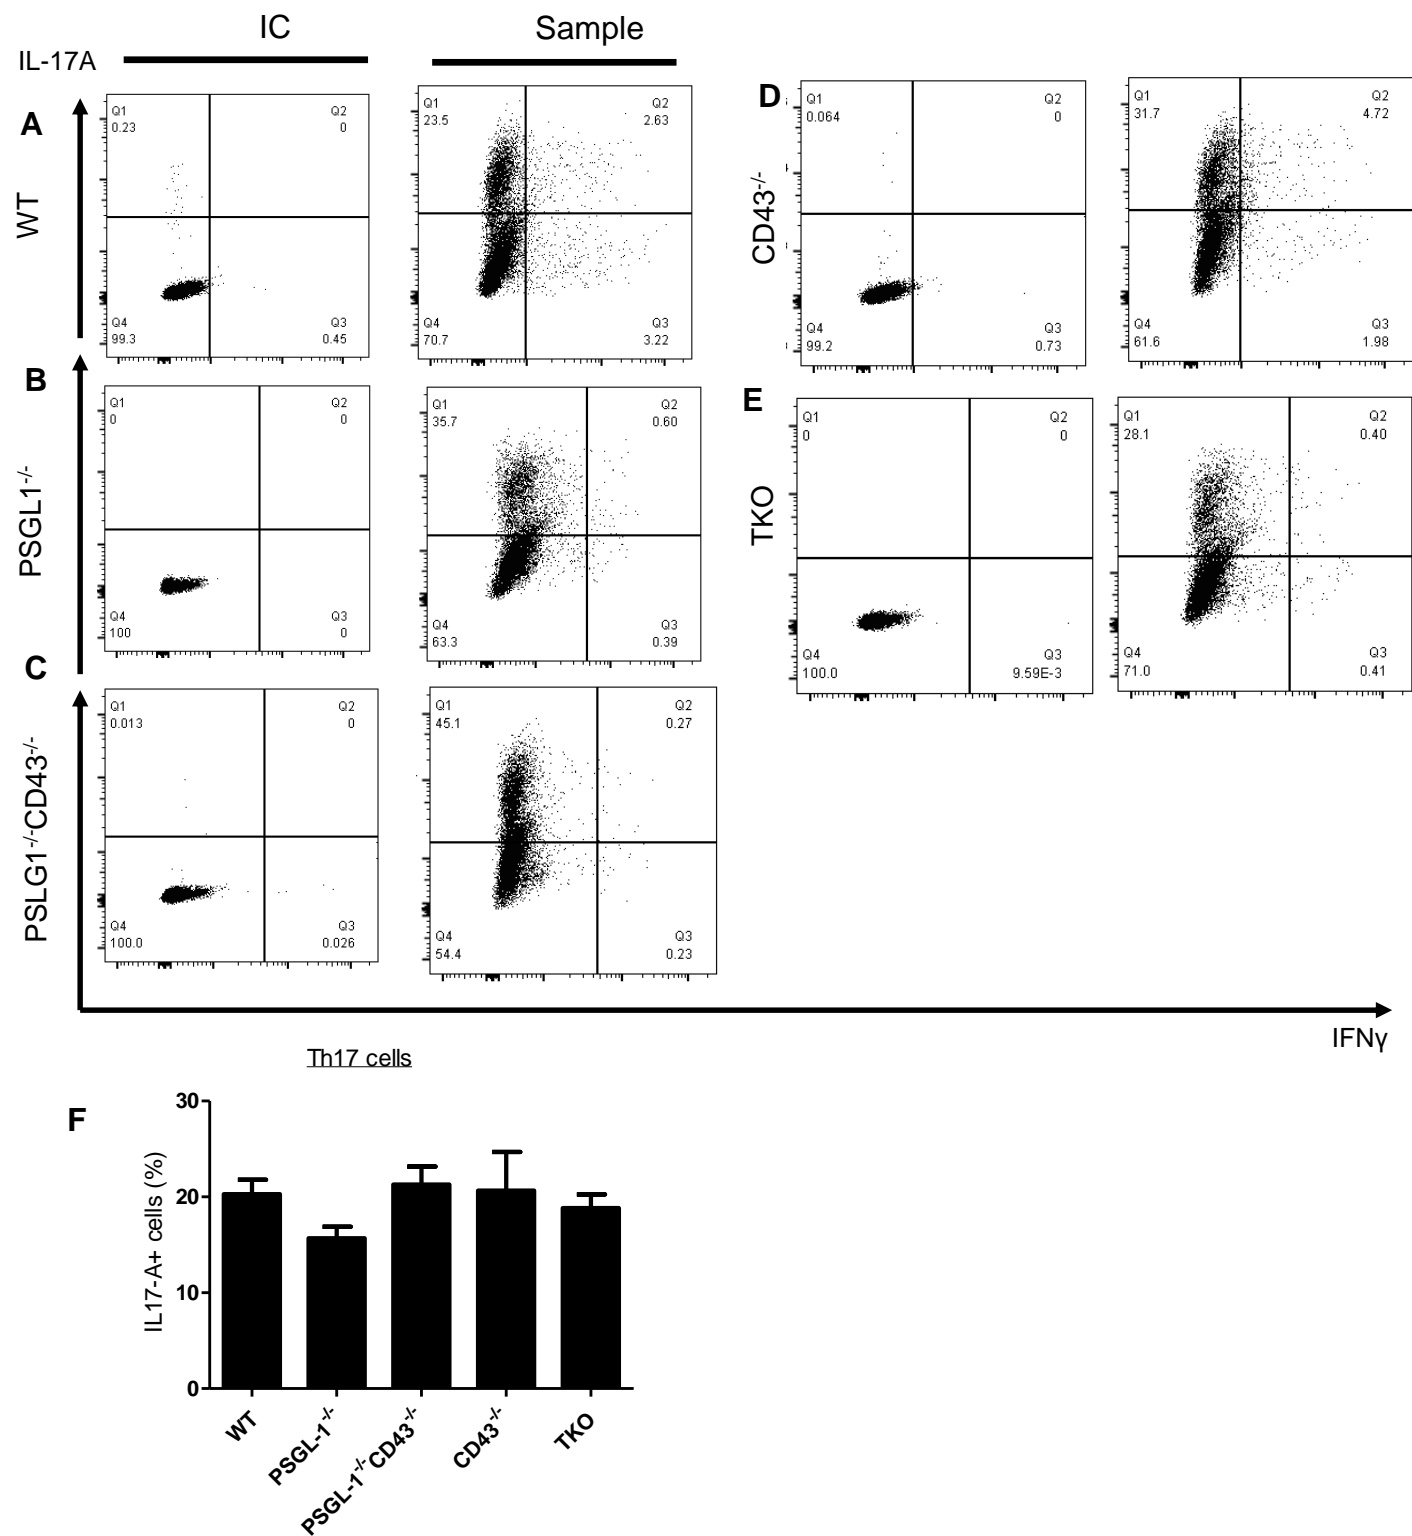

**Supplemental Figure 1: Th17 differentiation in the indicated candidate scaffold molecules deficient mice.** Naïve CD4<sup>+</sup> T cells from WT (A), PSGL-1 (B), PSGL-1<sup>-/-</sup>CD43<sup>-/-</sup> DKO (C), CD43<sup>-/-</sup> (D) and PSGL1<sup>-/-</sup>CD43<sup>-/-</sup>CD44<sup>-/-</sup> (TKO) (E) mice were polarized to Th17 cells as described in methods and assessed by flow cytometry for IL17-A staining. Quantification of the percentages of IL17A<sup>+</sup> cells among the different preparations for the indicated mice. A representative FACS plot is shown from 3-6 independent experiments quantified in F.

## Supplemental Figure 2 :

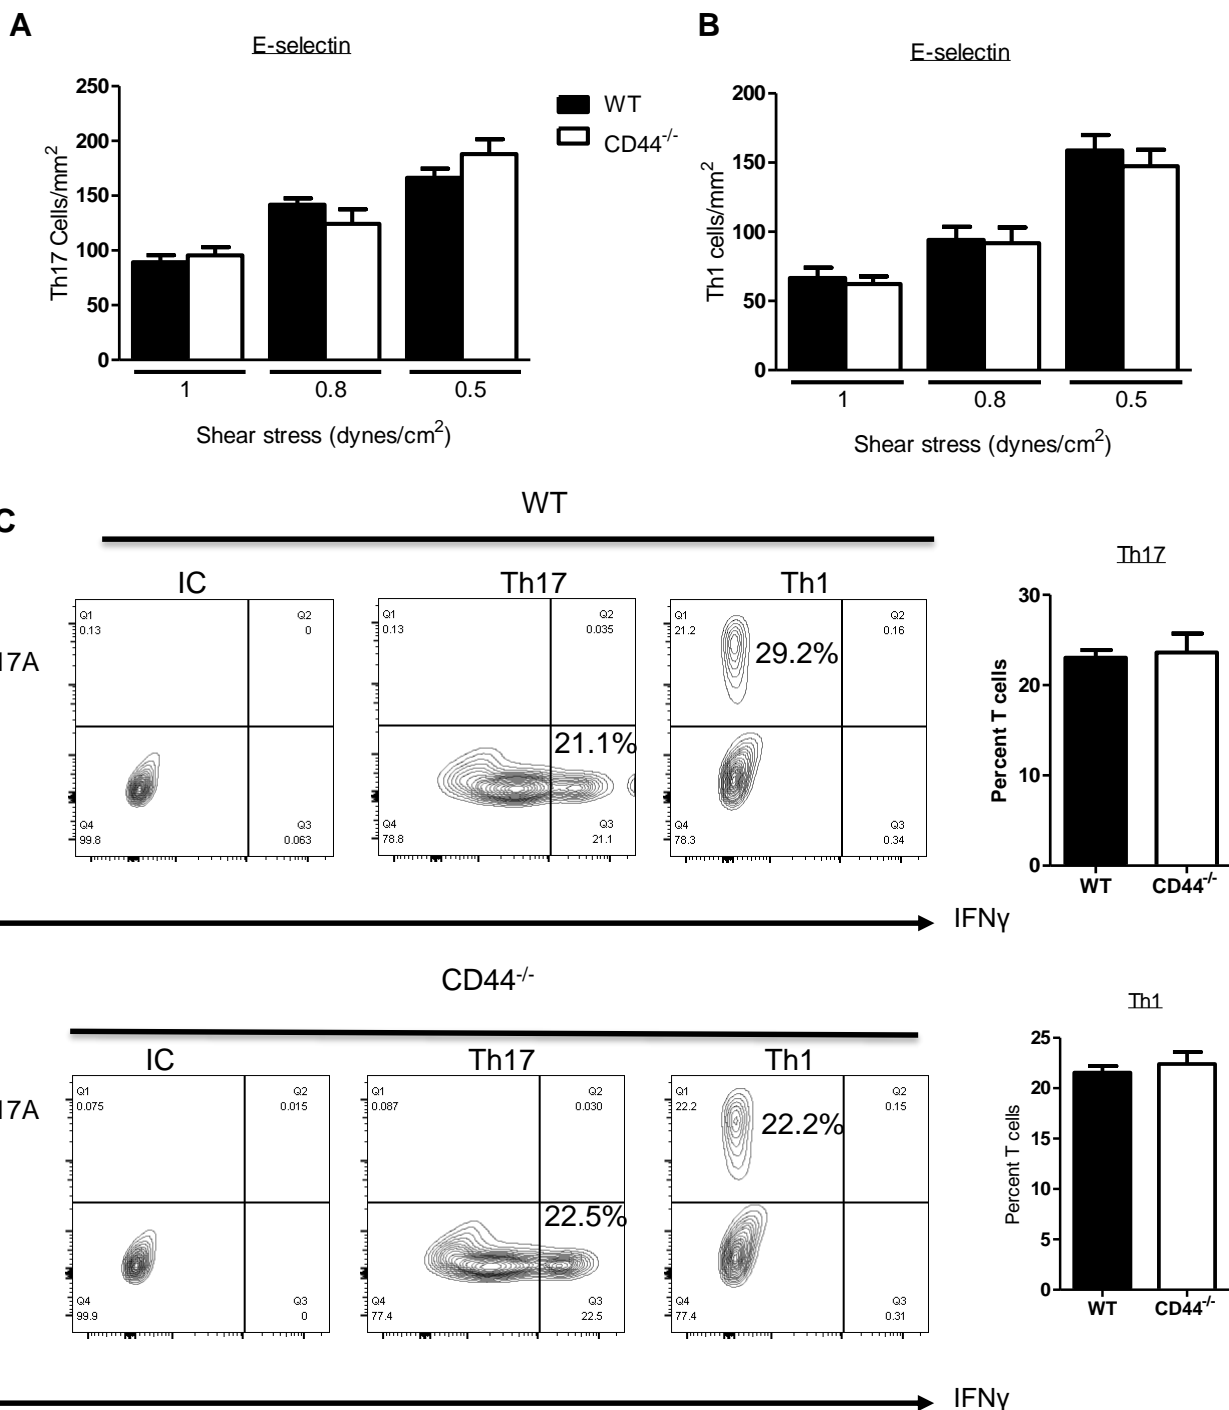

**Supplemental Figure 2: WT and CD44<sup>-/-</sup> Th17 and Th1 cells adhere to E-selectin in similar numbers.** Naïve CD4<sup>+</sup> T cells from WT and CD44<sup>-/-</sup> mice were polarized to Th17 (A) and Th1 cells (B) as described in materials and methods and perfused over E-selectin coated coverslips at the indicated shear stress. CD44<sup>-/-</sup> and WT naïve T cells differentiate into Th1 and Th17 cells similarly. Representative FACS plots and quantification (C-D). Data shown from 3 individual T cell preparation per cell subset.

### Supplemental Figure 3:

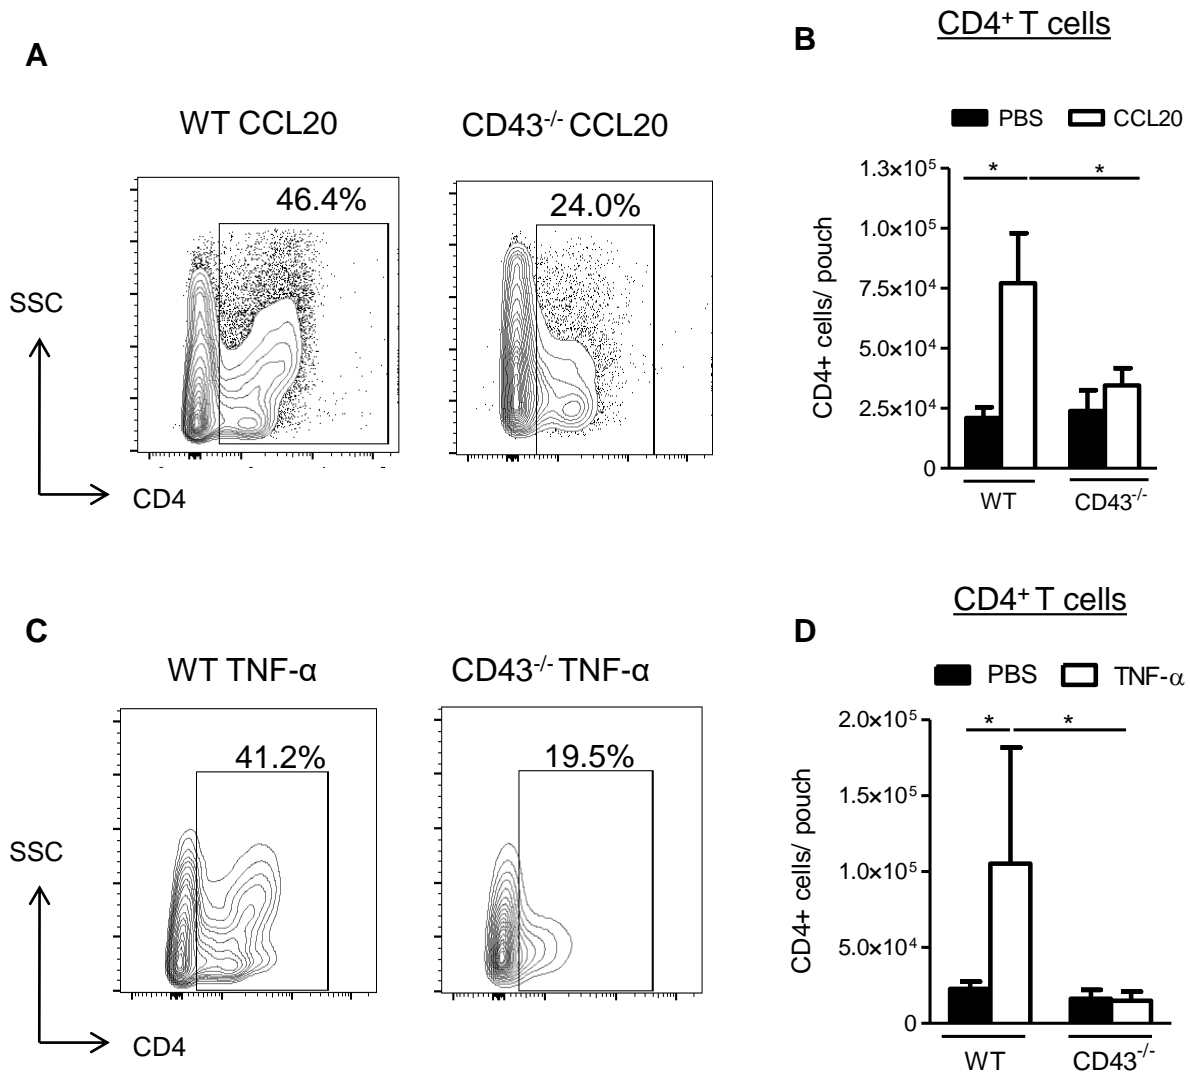

**Supplemental Figure 3:** CD4<sup>+</sup> cell recruitment in the air pouch of WT and CD43<sup>-/-</sup> mice after CCL20 or TNF $\alpha$  injection *in vivo*. WT and CD43<sup>-/-</sup> mice were injected with CCL20 (A-B) or TNF- $\alpha$  (C-D) into the air pouch. CD4<sup>+</sup> T cell recruitment was assessed by flow cytometry 24h after injection. Representative FACS plots are shown along with the quantification of CD4<sup>+</sup> recruitment in response to CCL20 (B) or TNF- $\alpha$  (D). Data is representative of 3 independent experiments with 5 mice per group for PBS and CCL20, and 4-7 mice per group for TNF- $\alpha$ . \*p<0.05

**Supplemental Figure 4:**

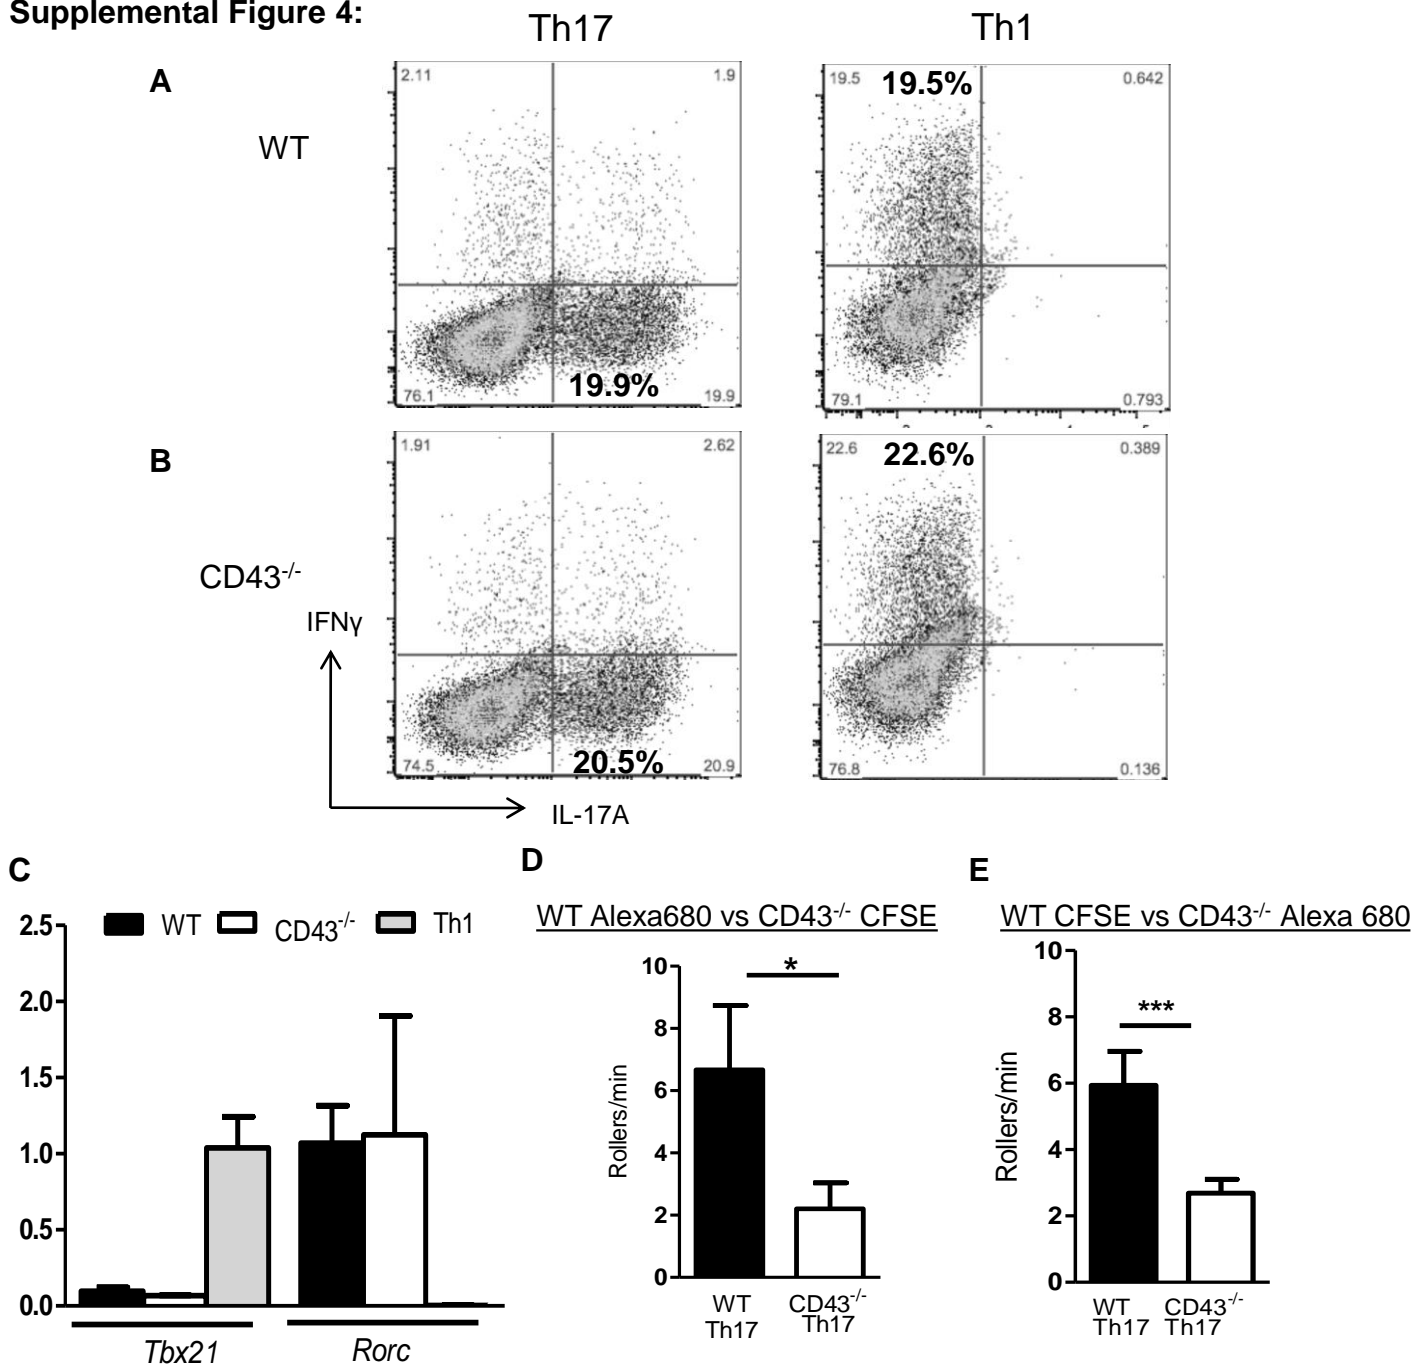

**Supplemental Figure 4:** Th17 and Th1 cell differentiation from WT and CD43<sup>-/-</sup> mice used in competitive rolling intravital microscopy studies. Less numbers of CD43<sup>-/-</sup> Th17 cells roll on the cremaster microvasculature as compared to WT Th17 cells, regardless of the dye used for Th17 cell labeling **A**. WT and **B**. CD43<sup>-/-</sup> Th17 and Th1 cells were generated from naïve isolated CD4<sup>+</sup> T cells using cytokine cocktails for Th17 or Th1 cells as described in methods. Both mouse strains generated similar number of cells as assessed by flow cytometry for IL17-A (Th17 cells) and IFN $\gamma$  (Th1 cells). FACS plots are representative of 3 separate experiments. **C**. Quality of T cell preparations was also verified by qPCR. Th17 cells from WT and CD43<sup>-/-</sup> show similar expression of ROR $\gamma$ T upon T cell differentiation. qPCR data is representative of 3-5 independent experiments. Th1 cells were used as control. **D**. Equal amounts of WT Th17 cells stained with Alexa 680 and CD43<sup>-/-</sup> Th17 cells stained with CFSE were injected via the femoral artery into the cremaster muscle. This phenotype was confirmed when the dyes were inverted (**E**). Data shown from 3 individual experiments using independent T cell preparations and imaging 3-5 vessels per experiment. \*p<0.05, \*\*\*p<0.005.
